## MIND diet associated with later onset of Parkinson's disease

Metcalfe-Roach A, BSc<sup>1,2</sup>, Yu AC, MSc<sup>3</sup>, Golz E, BA<sup>3</sup>, Sundvick K<sup>3</sup>, Cirstea MS, BSc<sup>1,2</sup>, BSc<sup>3</sup>, Kliger D, BA<sup>3</sup>, Foulger LH<sup>3</sup>, Mackenzie M, MD<sup>3,5</sup>, Finlay BB, PhD<sup>1,2,4</sup>, Appel-Cresswell S, MD<sup>\*3,5</sup>

1. Department of Microbiology and Immunology, University of British Columbia, Vancouver, British Columbia, Canada.
2. Michael Smith Laboratories, UBC, Vancouver, British Columbia, Canada.
3. Pacific Parkinson's Research Centre and Djavad Mowafaghian Centre for Brain Health, UBC, Vancouver, British Columbia, Canada.
4. Department of Biochemistry and Molecular Biology, UBC, Vancouver, British Columbia, Canada.
5. Division of Neurology, Faculty of Medicine, UBC, Vancouver, British Columbia, Canada

### ABSTRACT

**Background:** The MIND diet has been linked with prevention of cognitive decline but has not been fully assessed in the context of Parkinson's disease (PD).

**Objective:** To determine whether MIND diet adherence is associated with the age of Parkinson's disease onset.

**Methods:** Food Frequency Questionnaires from 181 participants with PD were scored for MIND adherence and correlated with age of onset using univariate and multivariate linear models.

**Results:** MIND adherence scores positively correlated with age of onset both independently ( $p=9.7e-5$ ) and in models including education, sex, disease duration, caloric intake, smoking, and exercise. Differences in age of PD onset in the high vs the low adhering tertiles corresponded to 6 years for men and 10.2 years for women. Effect sizes exceeded those previously reported for the Mediterranean diet.

**Conclusions:** These preliminary data suggest that the MIND diet may be an effective PD-delaying intervention, especially in women.

## INTRODUCTION

Numerous epidemiological studies have investigated the effects of regional dietary trends on population health and longevity. The Western diet, common in North America, is notorious for its high levels of processed and fried foods, sugar, and red meat; this diet has been linked to increased prevalence and severity of many diseases, including cardiovascular disease, diabetes, and cancer<sup>1,2</sup>. Conversely, the Mediterranean Diet (MeDi) was first noted for its correlation with reduced mortality related to cancer and cardiovascular disease<sup>3</sup> and is characterized in part by an antioxidant-rich mix of vegetables, whole grains, and reduced animal products. Interestingly, meta-analysis shows that MeDi also reduces the incidence of neurodegenerative diseases<sup>4</sup>, including Alzheimer's disease (AD) and Parkinson's disease (PD).

Similarly, the Dietary Approaches to Stop Hypertension (DASH) diet was originally designed in order to reduce cardiovascular disease<sup>5</sup>, but was also found to promote cognitive health<sup>6</sup>. Though similar to MeDi, the DASH diet also includes nuts, lean meat, and limits sugar/sodium intake. The improved brain health observed in both diets led to the development of the Mediterranean-DASH Intervention for Neurodegenerative Delay (MIND) diet, which combines elements of both dietary predecessors to minimize cognitive decline<sup>7</sup>. The MIND diet has been associated with up to a 54% reduction in AD incidence<sup>7</sup> and consistently proves to be more beneficial for cognitive health than either MeDi or the DASH diet individually<sup>8,9</sup>. Despite this success, little research has investigated the effect of the MIND diet on other neurodegenerative diseases. Agarwal et. al (2018) previously showed that higher MIND dietary adherence correlated with reduced incidence and progression of Parkinsonian symptoms during aging<sup>10</sup>, but to date no studies investigate the potential impact of the diet on patients formally diagnosed with PD. This cross-sectional study shows that adherence to the MIND diet correlates with delayed PD onset in a sex-specific manner and with a larger effect size than reported previously with MeDi<sup>11</sup>.

## **METHODS**

### **Participant Recruitment**

225 participants diagnosed with PD within the last 12 years were recruited through the Pacific Parkinson's Research Centre (PPRC) at the University of British Columbia (UBC), Canada, using inclusion/ exclusion criteria described previously<sup>12</sup>. The study was approved by the UBC Clinical Research Ethics Board and written informed consent was obtained from each participant.

### **Data Collection and MIND Scoring**

Dietary patterns were assessed using the EPIC-Norfolk Food Frequency Questionnaire (FFQ)<sup>13</sup>. Total energy intake was calculated using FETA<sup>14</sup> and is reported in kilocalories (kcal). FFQ food items were binned into 14 food groups: leafy greens, miscellaneous vegetables, berries, nuts, poultry (not fried), whole grains, fish (not fried), beans, wine, butter/margarine, cheese, red meat and products, fast fried foods, and pastries/sweets. The final food group, olive oil, was a binary variable dependent on whether the participant used olive oil as their primary cooking oil. Food items that did not fall in any of the MIND food groups were discarded. MIND dietary adherence was calculated using the number of servings per food group outlined by Berendsen et. al<sup>15</sup>, giving total scores out of 15 for each participant. Incomplete dietary surveys (n=36) were not included in the analysis as well as those with incomplete metadata (age of onset=1, education=7), leaving a total of 181 participants. Scores of <7, 7-8, and 9+ were chosen as the tertile ranges as they optimize participant distribution and have been used previously<sup>7</sup>. Habitual exercise was quantified using the Physical Activity Scale for the Elderly (PASE)<sup>16</sup>; however, these data were only collected from half of the cohort (n=101) as it was included after the study had commenced.

## Statistical Analysis

All analyses were conducted in R. Univariate associations were queried using Kruskal-Wallis tests for binary variables and linear regression for continuous variables, whereas multivariate linear regressions were used for all models. All linear regression models used age of onset or sex as the response variable and dietary score as the explanatory variable. Dietary score was treated as a continuous variable or with tertiles represented as ordinal factors. Nonparametric differences in the distribution of metadata across tertiles were assessed using Kruskal-Wallis tests for continuous variables and chi-square analysis for categorical variables (Table 1).

## RESULTS

### Female Participants Adhere More Strongly to the MIND Diet

Female participants had a MIND diet adherence score 0.8 units higher than males ( $p=0.002$ , Wilcoxon test) (**Table 1**). This difference remained significant after controlling for age, disease duration, and energy intake in a linear regression model ( $p=9.6e-5$ ).

### MIND Diet Adherence Correlates With Later Disease Onset, Especially Among Females

Univariate linear regression showed a robust positive correlation between MIND scores (/15) and the age of PD onset ( $\beta=1.5$ ,  $p=9.7e-5$ ). In order to compare the effect size of the MIND diet with previously-published MeDi data, the same linear model that controlled for sex, energy intake, education, and disease duration (DD model) was applied<sup>11</sup>. The model remained highly positively correlated and surpassed previously-reported correlations between MeDi and PD onset in both significance and effect size, regardless of whether dietary adherence was presented as a continuous variable ( $\beta=1.5$ ,  $p=1.1e-4$  vs.  $\beta=1.1$ ,  $p=0.006$ ) or as ordinal tertiles ( $\beta=4.5$ ,  $p=3.6e-5$  vs.  $\beta=2.3$ ,  $p=0.02$ ). It should be noted that the MeDi score ranges from 0-9 instead of 0-15; the comparable effect size from the MIND continuous data is thus  $1.5 \cdot 15/9 = 2.5$ , over twice that of MeDi. The smaller p values are particularly striking, as the present study is based on a smaller cohort ( $n=181$  vs.  $n=257$ ).

Interestingly, subgroup analysis in this model was more significant among females than males, and corresponded to delays of 10.2 and 6 years between low and high tertiles in the female and male subgroups, respectively. The same sex specificity was observed in the univariate model (**Figure 1**).

The model was then additionally adjusted for exercise and smoking habits (DD+ES model), which reduced the cohort to 101 participants (35 female, 66 male). Though every correlation between age of onset and MIND adherence became substantially stronger (**Table S1**), the mean MIND score was slightly higher in the reduced cohort as a result of poor tertile distribution (**Figure S1**), indicating that it does not accurately represent the larger cohort. Due to these limitations, these results cannot be accurately compared to the previous model; however, the association between higher MIND adherence and later onset is still strongly supported.

## **DISCUSSION**

These preliminary findings not only suggest a potential protective effect of the MIND diet against PD, but also indicate that the correlation is far stronger than previously observed with MeDi. The former corroborates a recent longitudinal study by Agarwal et. al (2018), where participants in the highest MIND dietary tertile developed parkinsonism at a rate 42% below that of the lowest tertile over an average observation period of 4.6 years<sup>10</sup>. These parkinsonism-specific findings mirror ongoing AD research, where the MIND diet has repeatedly proven more effective than MeDi as a preventative measure<sup>8</sup>. This is particularly important, both for its clinical applications and because it supports the notion that the two neurodegenerative diseases share similar etiologies, despite manifesting differently. Prior research suggests that the neuroprotective power of Mediterranean-type diets stems from a combination of several effects including its high levels of antioxidants, promotion of gut microbial short-chain fatty acid (SCFA) production, and reduction of LPS-containing bacteria, which overall serve to reduce inflammation<sup>17</sup>. Oxidative stress is highly implicated in both AD and PD etiologies<sup>18</sup>, and changes to the microbiome have

been observed and characterized to varying degrees in each disease<sup>12,19</sup>. PD in particular has been tied to reduced SCFA production<sup>12</sup> and several PD models are based on or exacerbated by LPS<sup>20,21</sup>; while microbial changes are less reproducible across AD patients<sup>19</sup>, current research similarly suggests SCFA and LPS involvement in AD etiology as well<sup>17,22</sup>.

Several previous studies have indicated that certain effects of MeDi are sex-specific, such as reduced cardiovascular risk<sup>23</sup> and reduced inflammation<sup>24</sup>. In contrast, few studies have previously identified sex-based differences related to the MIND diet. Though the tendency for females to adhere more closely to the diet observed in this study has been recorded in a number of previous publications<sup>7,25–30</sup>, this sex specificity remains unaddressed. A small suite of papers have utilized the Rush Memory and Aging Project (MAP) cohort to investigate the effect of the diet on the incidence and progression of several neurological conditions, including cognitive decline<sup>25</sup>, AD<sup>7</sup>, and parkinsonism<sup>10</sup>. Though no sex-specific effects were observed in these studies, several factors may account for this discrepancy. Firstly, the average age of the MAP participants is approximately 80, which is 15 years older than the present cohort. This suggests that the sex specificity observed here may be particularly relevant for the prevention of neurodegenerative disease in early/mid senium. Additionally, parkinsonism is an umbrella term that does not constitute a diagnosis of PD. In the corresponding study, 43% of the participants developed parkinsonism over a mean follow up of 4.6 years, which is an order of magnitude higher than the 10-year PD risk estimate for males aged 75 (2.6%)<sup>31</sup>. It is possible that the more inclusive definition of parkinsonism in the analysis masked any sex-specific effects that may be particular to PD.

To the best of our knowledge, this is the first study to examine the role of the MIND diet in a PD cohort. The sexually dimorphic correlations observed here support the hypothesis that different pathophysiological mechanisms underlie the PD etiologies of males and females<sup>32</sup>, which may lead to females being more responsive to a diet-based intervention. In complement to this

notion, the tendency for females to adhere more strongly to the MIND diet may contribute to their lower rate of PD incidence. The strong, female-driven correlations between MIND diet adherence and delayed PD onset paint a compelling rationale for interventional and animal-based studies that investigate the direct impact of the diet on PD etiology in a sex-specific manner.

## **ACKNOWLEDGEMENTS**

We would like to thank all study participants for their contributions to this study, along with all PPRC clinicians and staff members who facilitated the patient recruitment process. We would also like to acknowledge the contribution of the staff and participants of the EPIC-Norfolk Study.

## **AUTHORS' ROLES**

- 1) Research project: A. Conception, B. Organization, C. Execution;
- 2) Statistical Analysis: A. Design, B. Execution, C. Review and Critique;
- 3) Manuscript: A. Writing of the first draft, B. Review and Critique.

A.M.R.: 1A-C, 2A-C, 3A-B.

A.C.Y., E.G.: 1B-C, 3B.

K.S.: 1A-C.

M.S.C.: 2A,C, 3B.

D.K., L.H.F., M.M.: 1B-C.

B.B.F.: 1A-C, 2A,C, 3B

S.A.C.: 1A-C, 2A,C, 3B

## **FINANCIAL DISCLOSURES**

None.

## REFERENCES

1. Medina-Remón A, Kirwan R, Lamuela-Raventós RM, Estruch R. Dietary patterns and the risk of obesity, type 2 diabetes mellitus, cardiovascular diseases, asthma, and neurodegenerative diseases. *Crit Rev Food Sci Nutr*. 2018;58(2):262-296.  
doi:10.1080/10408398.2016.1158690
2. Elisia I, Cho B, Hay M, et al. The effect of diet and exercise on tobacco carcinogen-induced lung cancer. *Carcinogenesis*. 2019;40(3):448-460. doi:10.1093/carcin/bgz060
3. Keys A, Aravanis C, Blackburn H, et al. *Seven Countries*. Vol 245. London, UK: Harvard University Press; 2013. doi:10.4159/harvard.9780674497887
4. Sofi F, Cesari F, Abbate R, Gensini GF, Casini A. Adherence to Mediterranean diet and health status: meta-analysis. *BMJ*. 2008;337(sep11 2):a1344-a1344.  
doi:10.1136/bmj.a1344
5. Appel LJ, Moore TJ, Obarzanek E, et al. A Clinical Trial of the Effects of Dietary Patterns on Blood Pressure. *N Engl J Med*. 1997;336(16):1117-1124.  
doi:10.1056/NEJM199704173361601
6. Tangney CC, Li H, Wang Y, et al. Relation of DASH- and Mediterranean-like dietary patterns to cognitive decline in older persons. *Neurology*. 2014;83(16):1410-1416.  
doi:10.1212/WNL.0000000000000884
7. Morris MC, Tangney CC, Wang Y, Sacks FM, Bennett DA, Aggarwal NT. MIND diet associated with reduced incidence of Alzheimer's disease. *Alzheimer's Dement*. 2015;11(9):1007-1014. doi:10.1016/j.jalz.2014.11.009
8. Panza F, Lozupone M, Solfrizzi V, et al. *Contribution of Mediterranean Diet in the Prevention of Alzheimer's Disease*. Elsevier Inc.; 2018. doi:10.1016/b978-0-12-811959-4.00009-2
9. Hosking DE, Eramudugolla R, Cherbuin N, Anstey KJ. MIND not Mediterranean diet related to 12-year incidence of cognitive impairment in an Australian longitudinal cohort



- study. *Alzheimer's Dement.* 2019;15(4):581-589. doi:10.1016/j.jalz.2018.12.011
10. Agarwal P, Wang Y, Buchman AS, Holland TM, Bennett DA, Morris MC. MIND Diet Associated with Reduced Incidence and Delayed Progression of Parkinsonism in Old Age. *J Nutr Heal Aging.* 2018;22(10):1211-1215. doi:10.1007/s12603-018-1094-5
  11. Alcalay RN, Gu Y, Mejia-Santana H, Cote L, Marder KS, Scarmeas N. The association between Mediterranean diet adherence and Parkinson's disease. *Mov Disord.* 2012;27(6):771-774. doi:10.1002/mds.24918
  12. Cirstea MS, Yu AC, Golz E, et al. Microbiota Composition and Metabolism Are Associated With Gut Function in Parkinson's Disease. *Mov Disord.* May 2020:mds.28052. doi:10.1002/mds.28052
  13. Bingham SA, Welch AA, McTaggart A, et al. Nutritional methods in the European Prospective Investigation of Cancer in Norfolk. *Public Health Nutr.* 2001;4(3):847-858. doi:10.1079/PHN2000102
  14. Mulligan AA, Luben RN, Bhaniani A, et al. A new tool for converting food frequency questionnaire data into nutrient and food group values: FETA research methods and availability. *BMJ Open.* 2014;4(3):e004503. doi:10.1136/bmjopen-2013-004503
  15. Berendsen AM, Kang JH, Feskens EJM, de Groot CPGM, Grodstein F, van de Rest O. Association of long-term adherence to the mind diet with cognitive function and cognitive decline in American women. *J Nutr Heal Aging.* 2018;22(2):222-229. doi:10.1007/s12603-017-0909-0
  16. Washburn RA, Smith KW, Jette AM, Janney CA. The physical activity scale for the elderly (PASE): Development and evaluation. *J Clin Epidemiol.* 1993;46(2):153-162. doi:[https://doi.org/10.1016/0895-4356\(93\)90053-4](https://doi.org/10.1016/0895-4356(93)90053-4)
  17. Jackson A, Forsyth CB, Shaikh M, et al. Diet in Parkinson's Disease: Critical Role for the Microbiome. *Front Neurol.* 2019;10. doi:10.3389/fneur.2019.01245
  18. Dumitrescu L, Popescu-Olaru I, Cozma L, et al. Oxidative Stress and the Microbiota-Gut-

- Brain Axis. *Oxid Med Cell Longev*. 2018;2018:1-12. doi:10.1155/2018/2406594
19. Radisavljevic N, Cirstea M, Brett Finlay B. Bottoms up: the role of gut microbiota in brain health. *Environ Microbiol*. 2019;00. doi:10.1111/1462-2920.14506
  20. Parra I, Martínez I, Ramírez-García G, Tizabi Y, Mendieta L. Differential Effects of LPS and 6-OHDA on Microglia's Morphology in Rats: Implications for Inflammatory Model of Parkinson's Disease. *Neurotox Res*. 2020;37(1):1-11. doi:10.1007/s12640-019-00104-z
  21. García-Domínguez I, Veselá K, García-Revilla J, et al. Peripheral Inflammation Enhances Microglia Response and Nigral Dopaminergic Cell Death in an in vivo MPTP Model of Parkinson's Disease. *Front Cell Neurosci*. 2018;12:398. doi:10.3389/fncel.2018.00398
  22. Wenzel TJ, Gates EJ, Ranger AL, Klegeris A. Short-chain fatty acids (SCFAs) alone or in combination regulate select immune functions of microglia-like cells. *Mol Cell Neurosci*. doi:10.1016/j.mcn.2020.103493
  23. Bédard A, Riverin M, Dodin S, Corneau L, Lemieux S. Sex differences in the impact of the Mediterranean diet on cardiovascular risk profile. *Br J Nutr*. 2012;108(8):1428-1434. doi:10.1017/S0007114511006969
  24. Bédard A, Lamarche B, Corneau L, Dodin S, Lemieux S. Sex differences in the impact of the Mediterranean diet on systemic inflammation. *Nutr J*. 2015;14(1):46. doi:10.1186/s12937-015-0035-y
  25. Morris MC, Tangney CC, Wang Y, et al. MIND diet slows cognitive decline with aging. *Alzheimer's Dement*. 2015;11(9):1015-1022. doi:10.1016/j.jalz.2015.04.011
  26. Agarwal P, Wang Y, Buchman AS, Holland TM, Bennett DA, Morris MC. MIND Diet Associated with Reduced Incidence and Delayed Progression of Parkinsonism in Old Age. *J Nutr Heal Aging*. 2018;22(10):1211-1215. doi:10.1007/s12603-018-1094-5
  27. Cherian L, Wang Y, Fakuda K, Leurgans S, Aggarwal N, Morris M. Mediterranean-Dash Intervention for Neurodegenerative Delay (MIND) Diet Slows Cognitive Decline After Stroke. *J Prev Alz Dis*. 2019;6(4):267-273. doi:http://dx.doi.org/10.14283/jpad.2019.28

28. Salari-Moghaddam A, Keshteli AH, Mousavi SM, Afshar H, Esmailzadeh A, Adibi P. Adherence to the MIND diet and prevalence of psychological disorders in adults. *J Affect Disord.* 2019;256(April):96-102. doi:10.1016/j.jad.2019.05.056
29. McEvoy CT, Guyer H, Langa KM, Yaffe K. Neuroprotective Diets Are Associated with Better Cognitive Function: The Health and Retirement Study. *J Am Geriatr Soc.* 2017;65(8):1857-1862. doi:10.1111/jgs.14922
30. Aminianfar A, Hassanzadeh Keshteli A, Esmailzadeh A, Adibi P. Association between adherence to MIND diet and general and abdominal obesity: A cross-sectional study. *Nutr J.* 2020;19(1):1-9. doi:10.1186/s12937-020-00531-1
31. Driver JA, Logroscino G, Gaziano JM, Kurth T. Incidence and remaining lifetime risk of Parkinson disease in advanced age. *Neurology.* 2009;72(5):432-438. doi:10.1212/01.wnl.0000341769.50075.bb
32. Gillies GE, Pienaar IS, Vohra S, Qamhawi Z. Sex differences in Parkinson's disease. *Front Neuroendocrinol.* 2014;35(3):370-384. doi:<https://doi.org/10.1016/j.yfrne.2014.02.002>

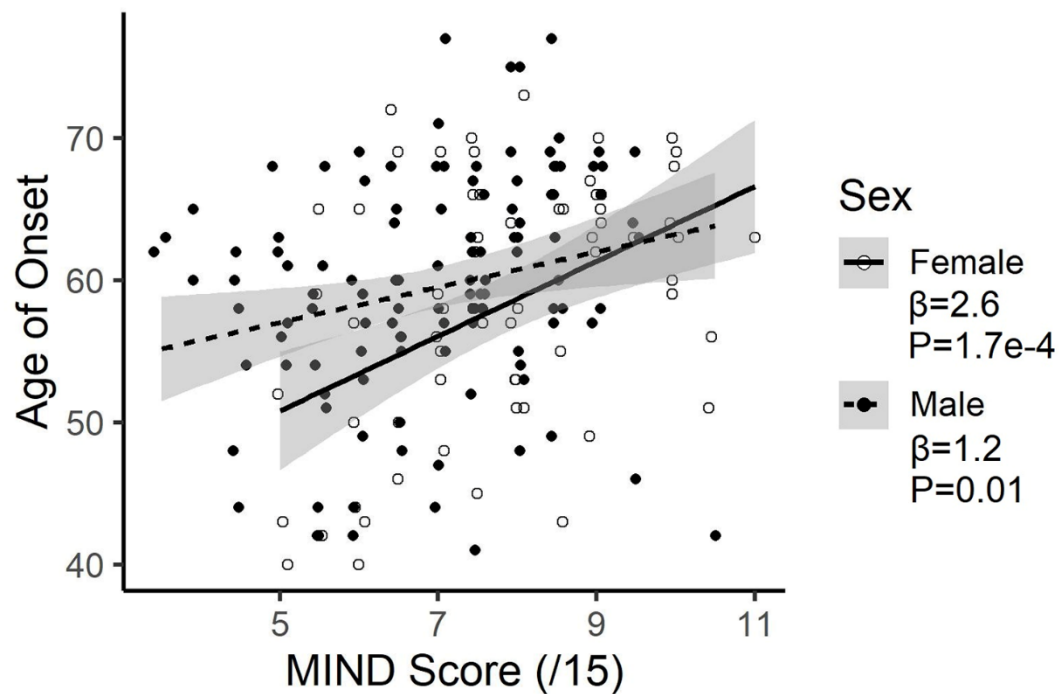

**Figure 1. Interaction plot of sex-dependent correlations between MIND score and age of PD onset.** Univariate linear regressions were used to calculate the estimates ( $\beta$ ) and p values (P).

**Table 1. Cohort characteristics.**

|                          | Total Cohort |      |      |      |         | Female |      |      |      |         | Male |      |      |      |         |
|--------------------------|--------------|------|------|------|---------|--------|------|------|------|---------|------|------|------|------|---------|
|                          | All          | <7   | 7-8  | 8.5+ | P value | All    | <7   | 7-8  | 8.5+ | P value | All  | <7   | 7-8  | 8.5+ | P value |
| n (total)                | 181          | 66   | 66   | 49   |         | 65     | 17   | 24   | 24   |         | 116  | 49   | 42   | 25   |         |
| Mean MIND Score          | 7.3          | 5.6  | 7.5  | 9.1  |         | 7.8    | 5.8  | 7.5  | 9.4  |         | 7    | 5.5  | 7.5  | 8.9  |         |
| % Female                 | 35.9         | 25.8 | 36.4 | 49   | 0.037   | n/a    | n/a  | n/a  | n/a  |         | n/a  | n/a  | n/a  | n/a  |         |
| Age                      | 65.2         | 62.1 | 66.4 | 67.9 | 0.001   | 64     | 57.9 | 64.9 | 67.5 | 0.006   | 65.9 | 63.6 | 67.3 | 68.2 | 0.015   |
| Disease Duration (years) | 6.2          | 6.7  | 6.3  | 5.6  | 0.244   | 5.9    | 6.2  | 6    | 5.6  | 0.837   | 6.4  | 6.8  | 6.5  | 5.5  | 0.33    |
| Age of Onset             | 59           | 55.4 | 60.1 | 62.3 | <0.001  | 58     | 51.7 | 58.9 | 61.9 | 0.005   | 59.5 | 56.7 | 60.7 | 62.7 | 0.002   |
| Energy Intake (kcal)     | 1684         | 1523 | 1782 | 1768 | 0.005   | 1683   | 1520 | 1752 | 1730 | 0.258   | 1684 | 1524 | 1799 | 1805 | 0.021   |
| Education (years)        | 16.2         | 15.9 | 16.2 | 16.4 | 0.479   | 15.8   | 15.2 | 16   | 16.2 | 0.259   | 16.3 | 16.2 | 16.3 | 16.6 | 0.705   |
| Exercise Score           | 159          | 168  | 149  | 160  | 0.617   | 150    | 137  | 124  | 174  | 0.062   | 164  | 177  | 160  | 141  | 0.601   |
| % Smokers                | 43.3         | 46.2 | 43.9 | 38.8 | 0.728   | 36.9   | 29.4 | 37.5 | 41.7 | 0.724   | 47.0 | 52.1 | 47.6 | 36   | 0.423   |

The All column represents mean values for the overall cohort, whereas columns <7, 7-8, and 8.5+ are per MIND tertile. Differences between tertiles were calculated using nonparametric (numerical data) and chi-square tests (categorical data).
